# Supplementary material for: Synthesis, Photophysical and Electrochemical Properties of a Mixed Bipyridyl-Phenanthrolyl Ligand Ru(II) Heteroleptic Complex Having trans-2-Methyl-2-butenoic Acid Functionalities
Source: Molecules. 2011 Sep 30;16(10):8353–67. doi: 10.3390/molecules16108353 (PMC6264457; doi:10.3390/molecules16108353)

## Supplementary Information

# Synthesis, Photophysical and Electrochemical Properties of a Mixed Bipyridyl-Phenanthrolyl Ligands Ru(II) Heteroleptic Complex Having 2-Methy-2-butenic Acid Functionality

Adewale O. Adeloye

Department of Chemistry, Faculty of Science and Agriculture, University of Fort Hare, P.M.B. X1314, Alice 5700, South Africa; E-Mail: aadeloye@ufh.ac.za; Tel.: +27-761-423-313; Fax: +27-406-022-366.

S1.  $^1\text{H}$ -NMR spectrum of  $\text{L}_1$ .

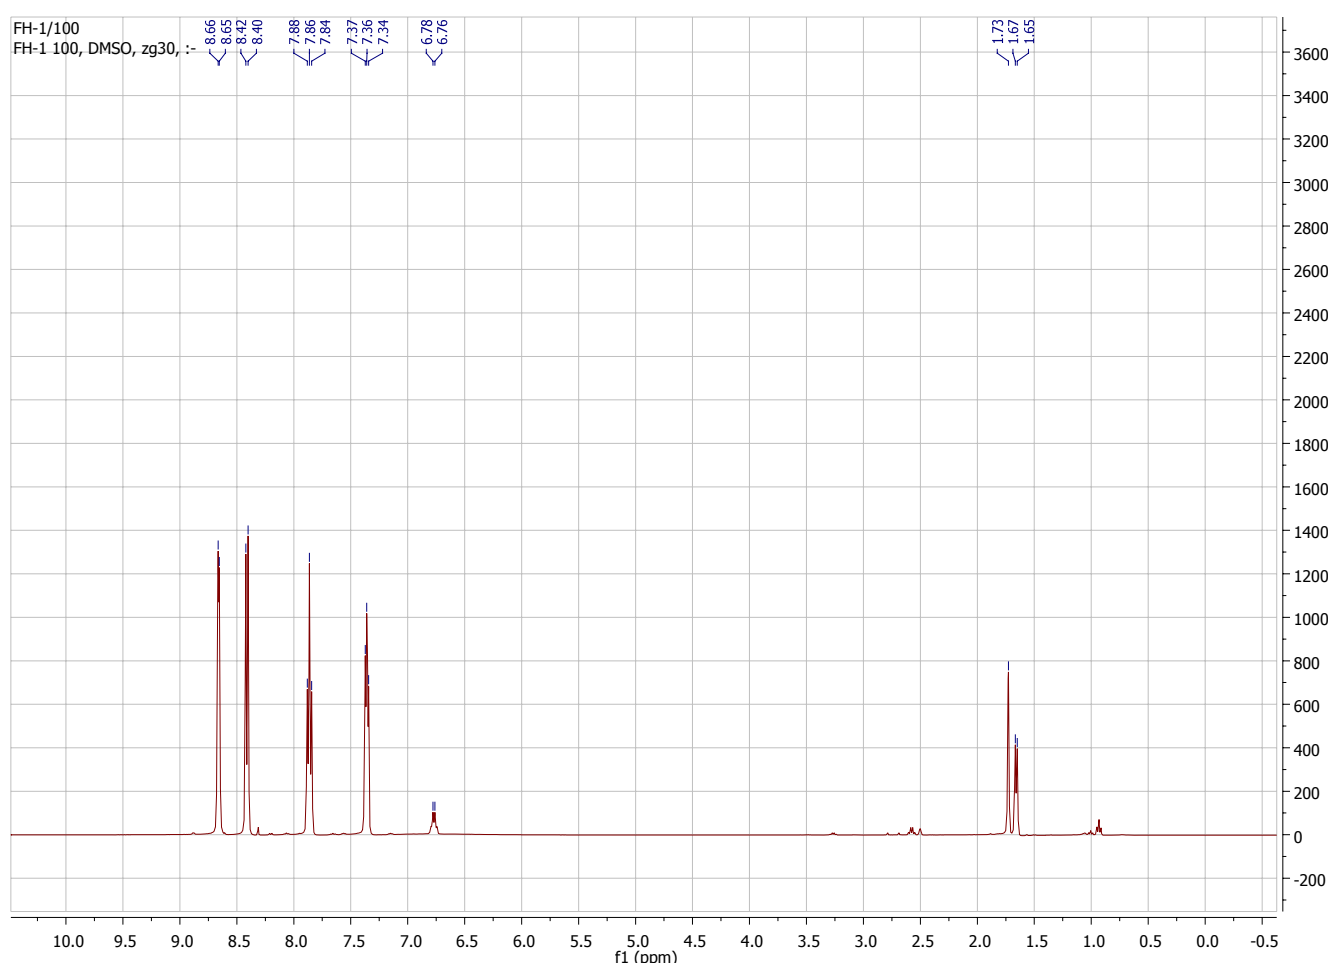

# **S1. Cont.**

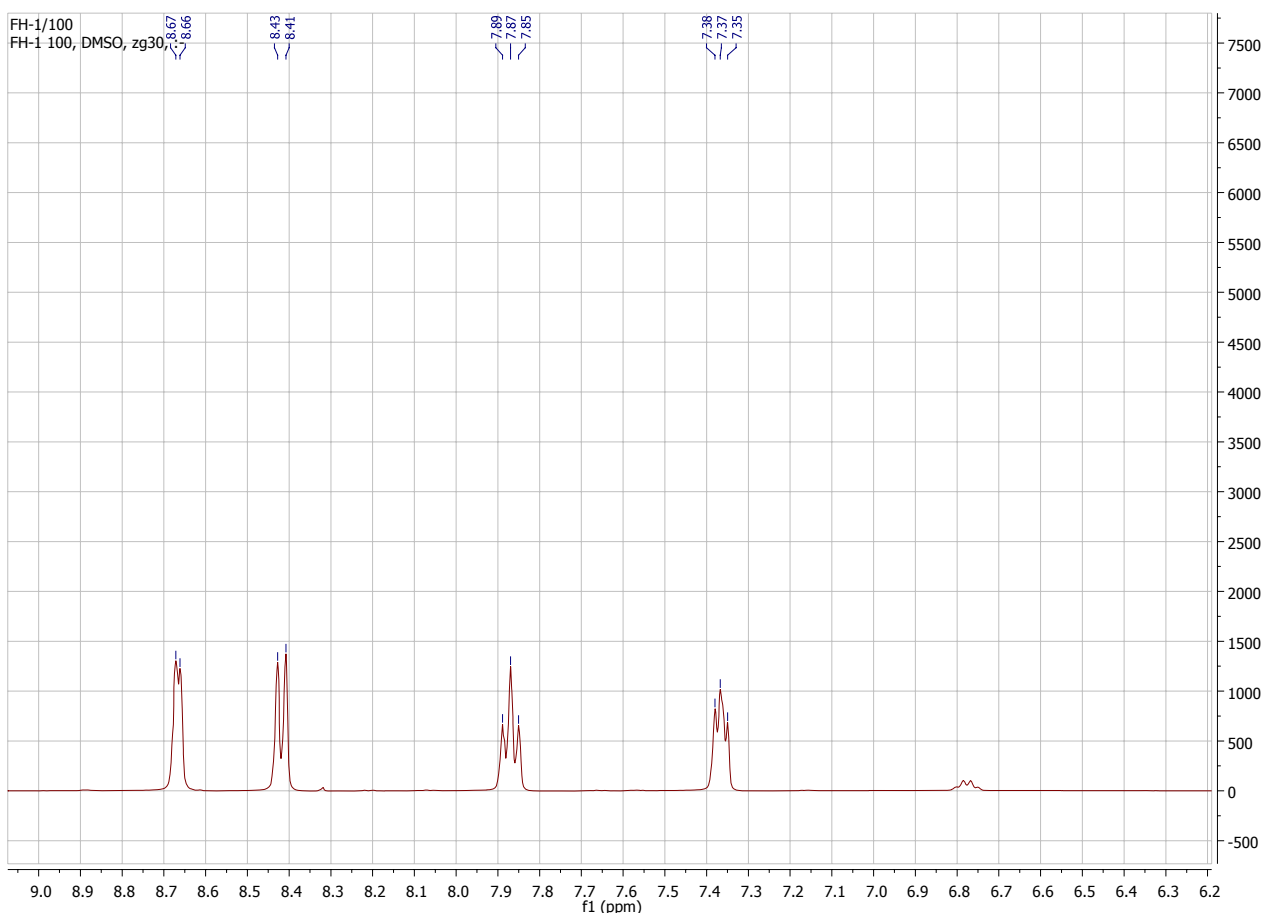

## **S2. $^{13}\text{C}$ -NMR spectrum of $\text{L}_1$ .**

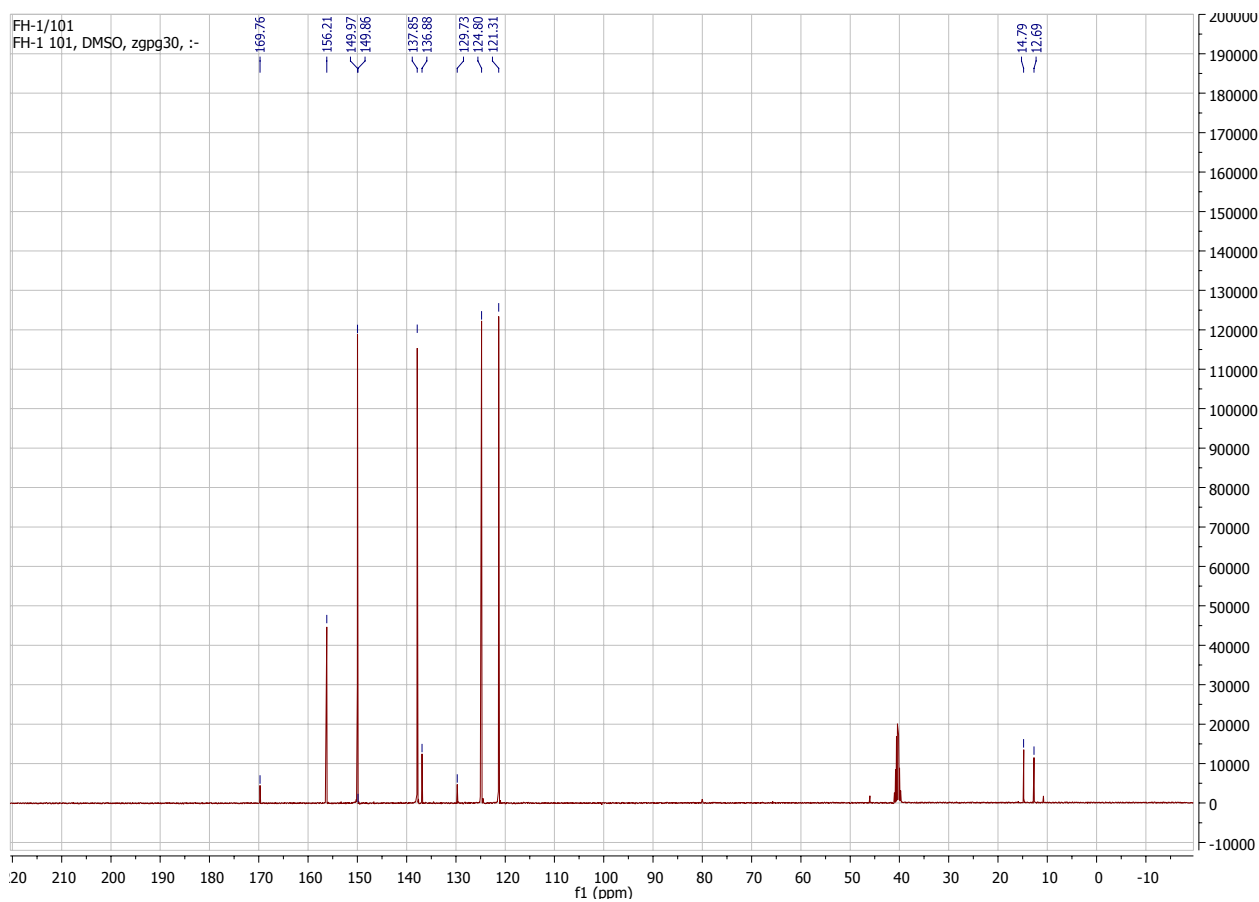

## S2. Cont.

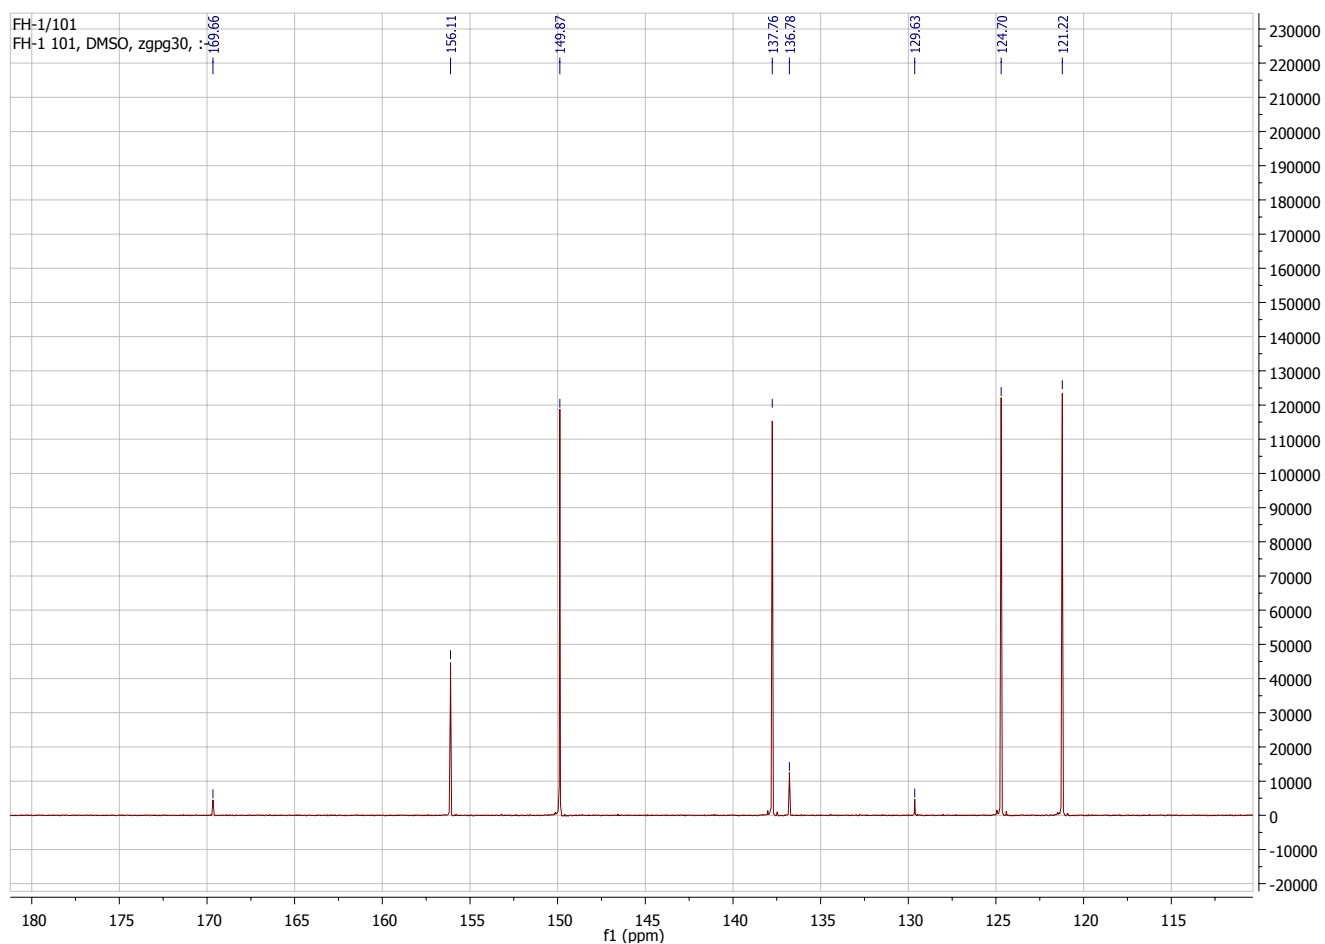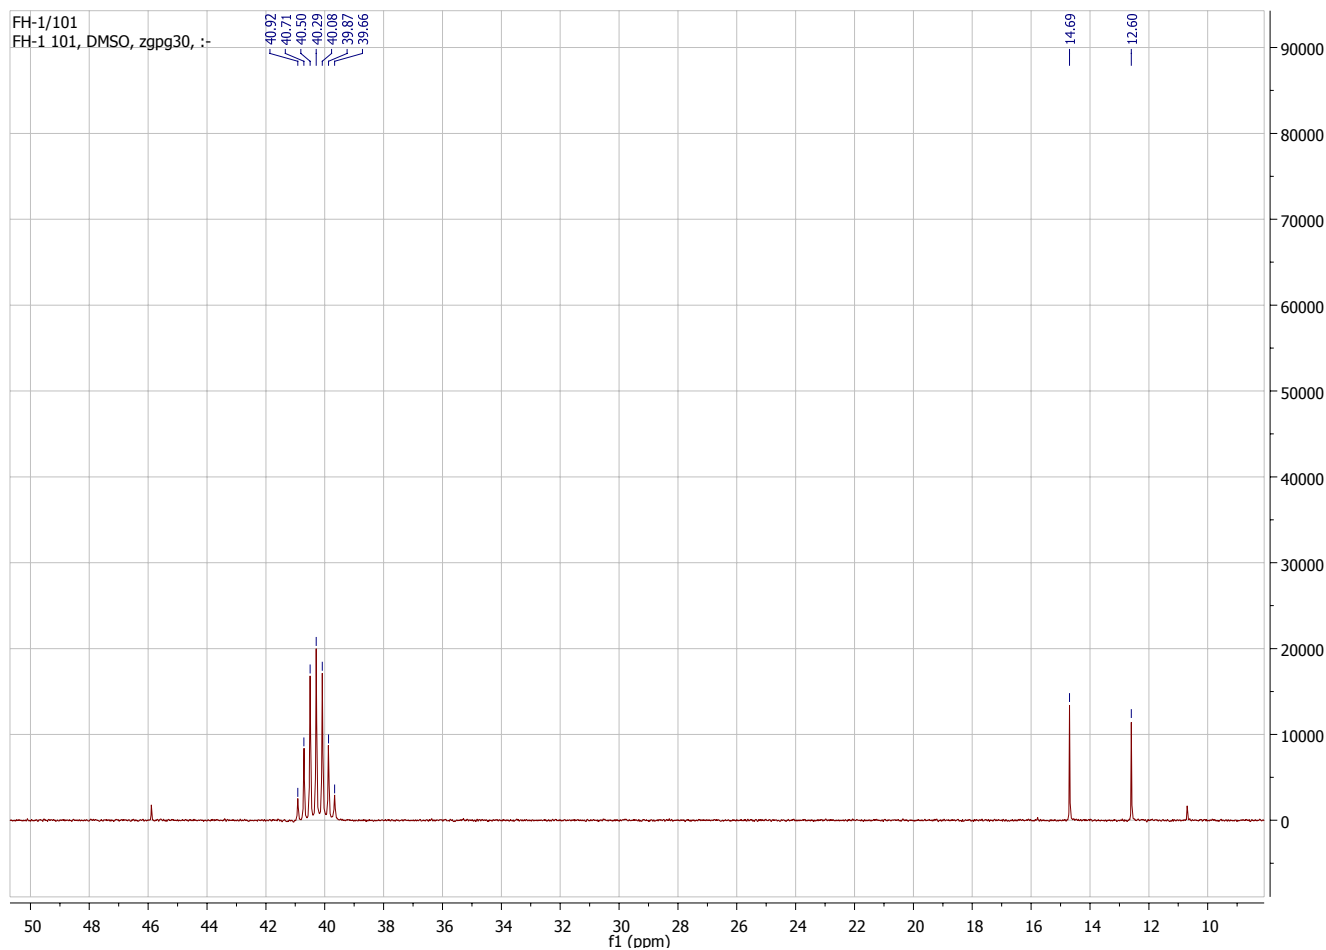

**S3.**  $^1\text{H}$ -NMR spectrum of  $[\text{Ru}(\text{L}_1)_2(\text{NCS})_2]$ .

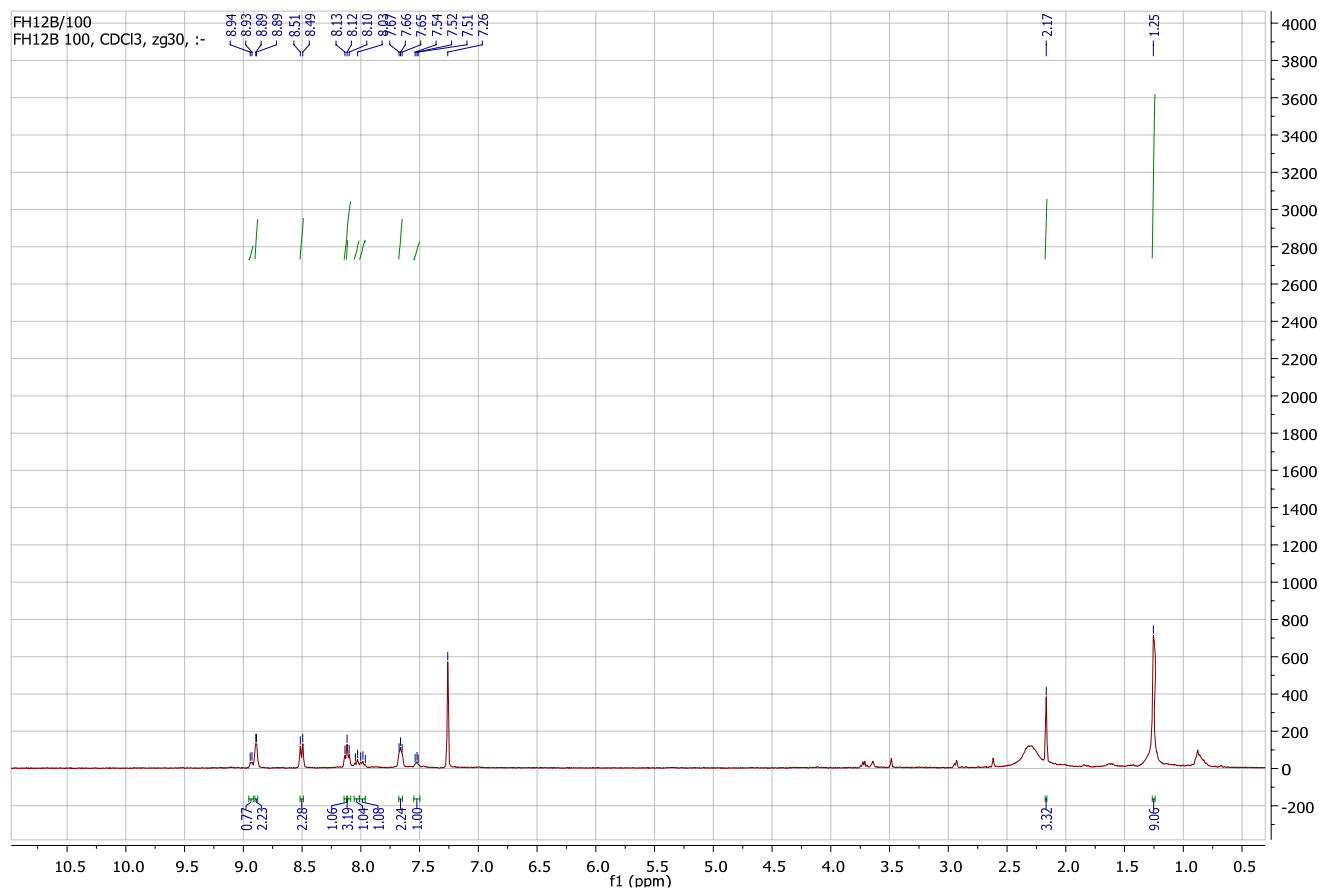

Aromatic region of  $^1\text{H}$ -NMR spectrum of complex  $[\text{Ru}(\text{L}_1)_2(\text{NCS})_2]$ .

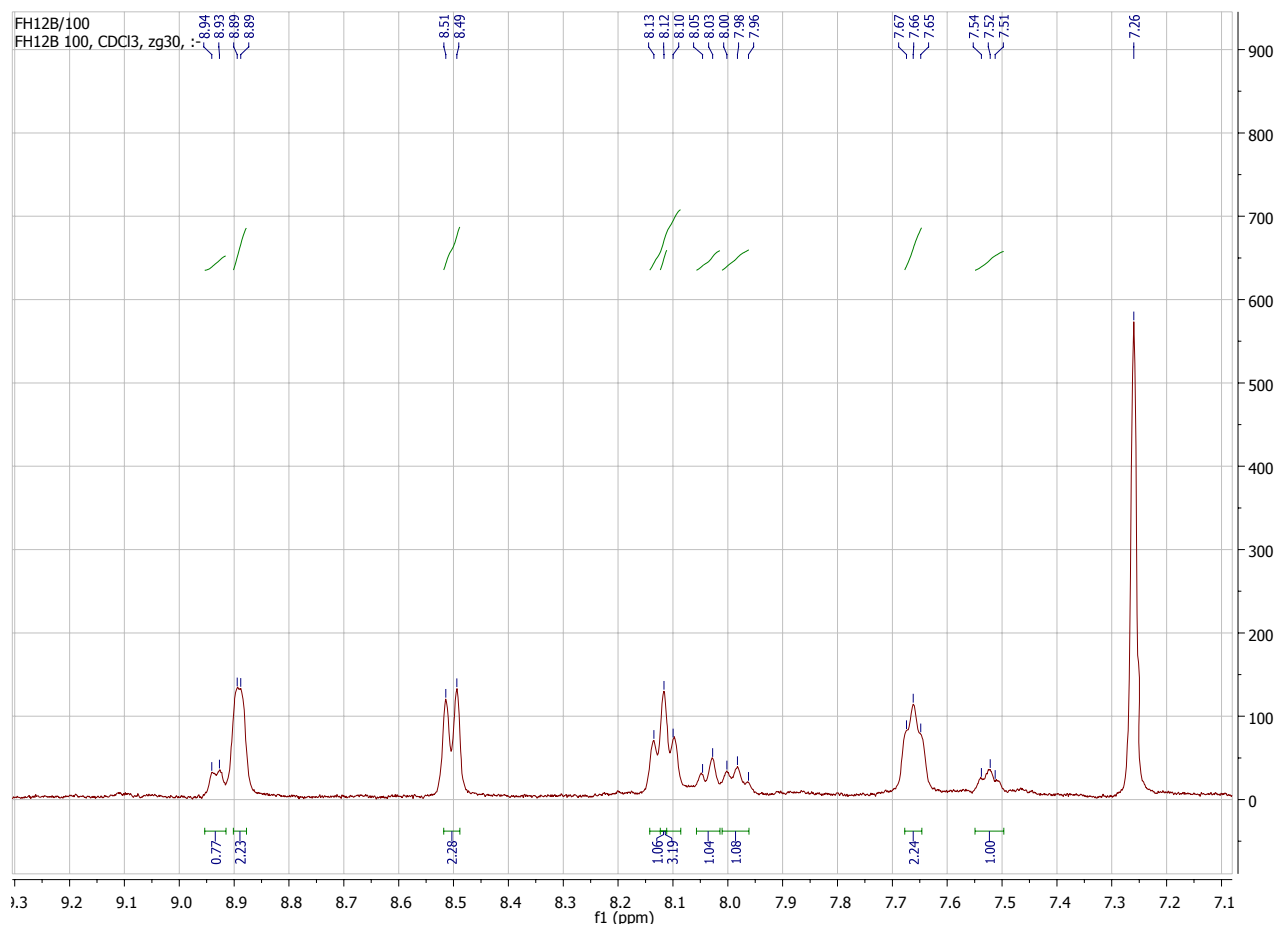

**S4.** Aromatic region  $^1\text{H}$ -NMR spectrum of **L<sub>2</sub>**.

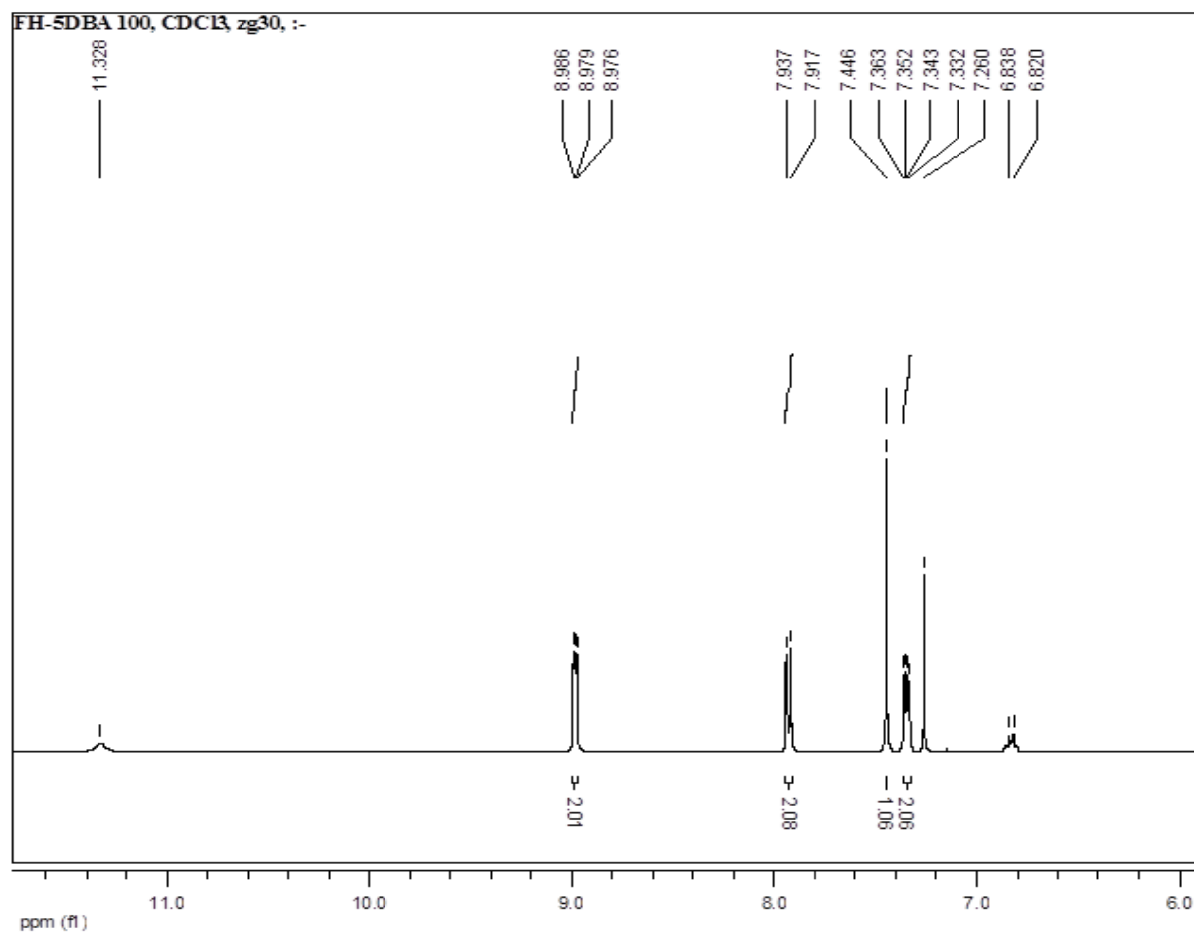

**S5.** Aliphatic region  $^1\text{H}$ -NMR of **L<sub>2</sub>**.

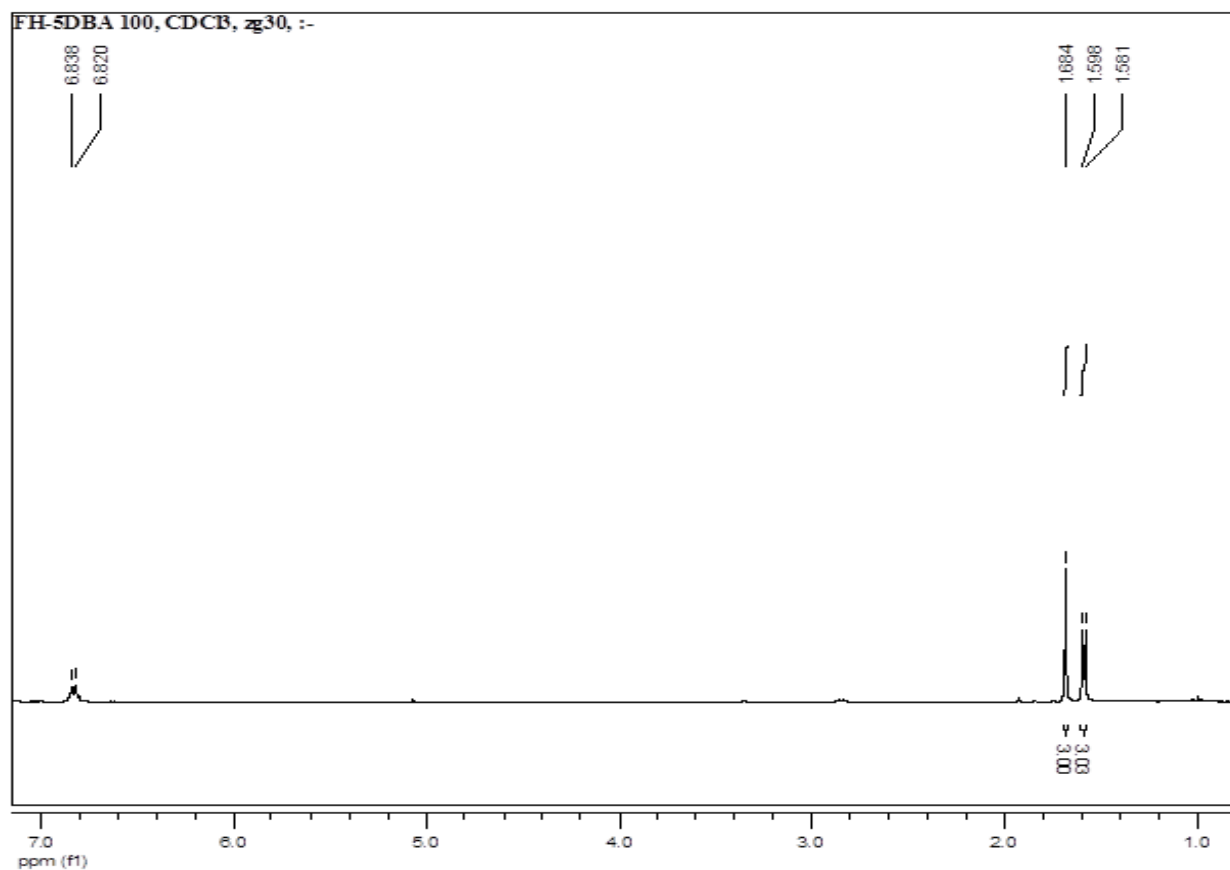

**S6.**  $^{13}\text{C}$ -NMR spectrum of **L<sub>2</sub>**.

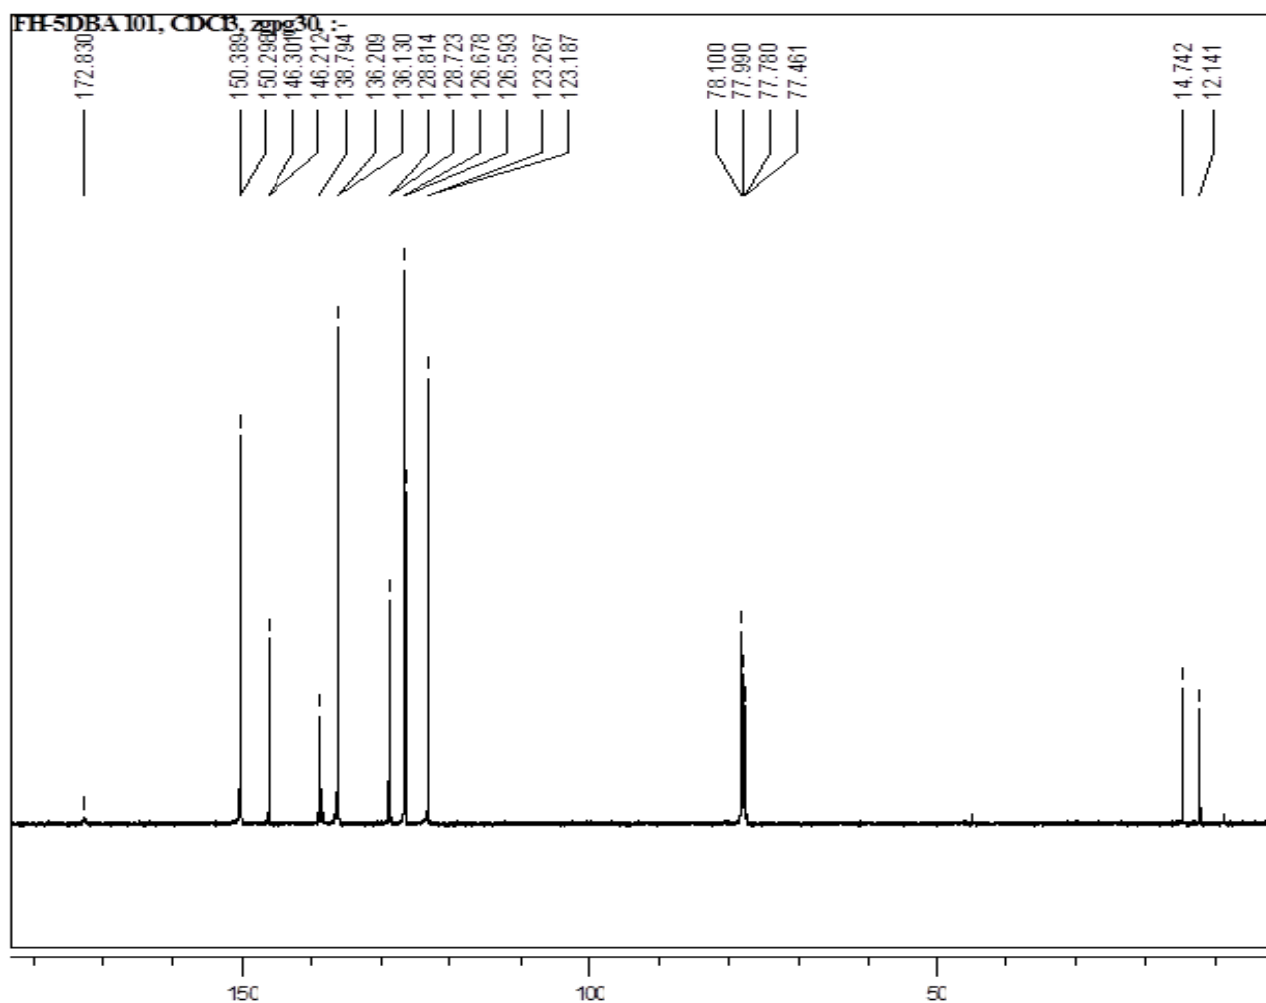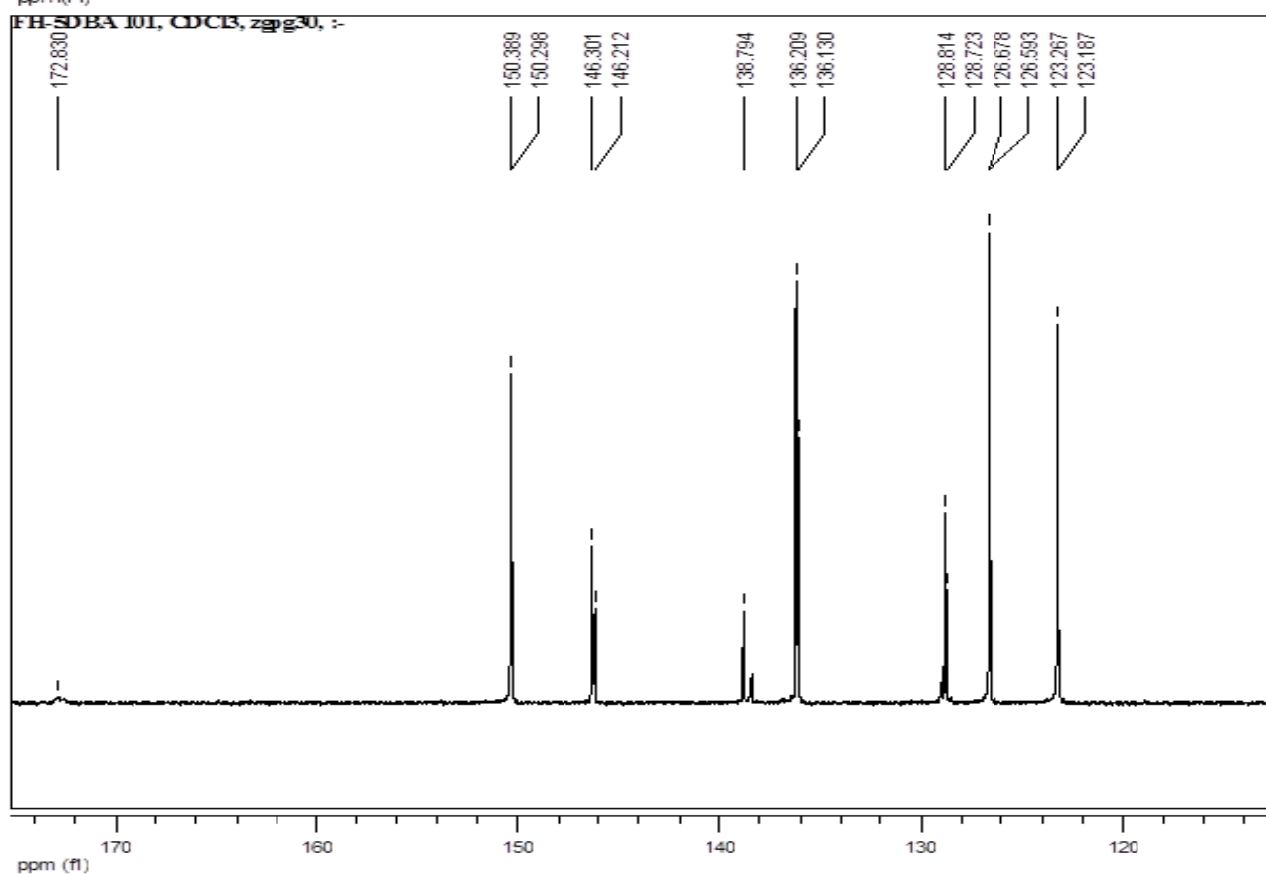

S7.  $^1\text{H}$ -NMR spectrum of  $[\text{Ru}(\text{L}_2)_2(\text{NCS})_2]$ .

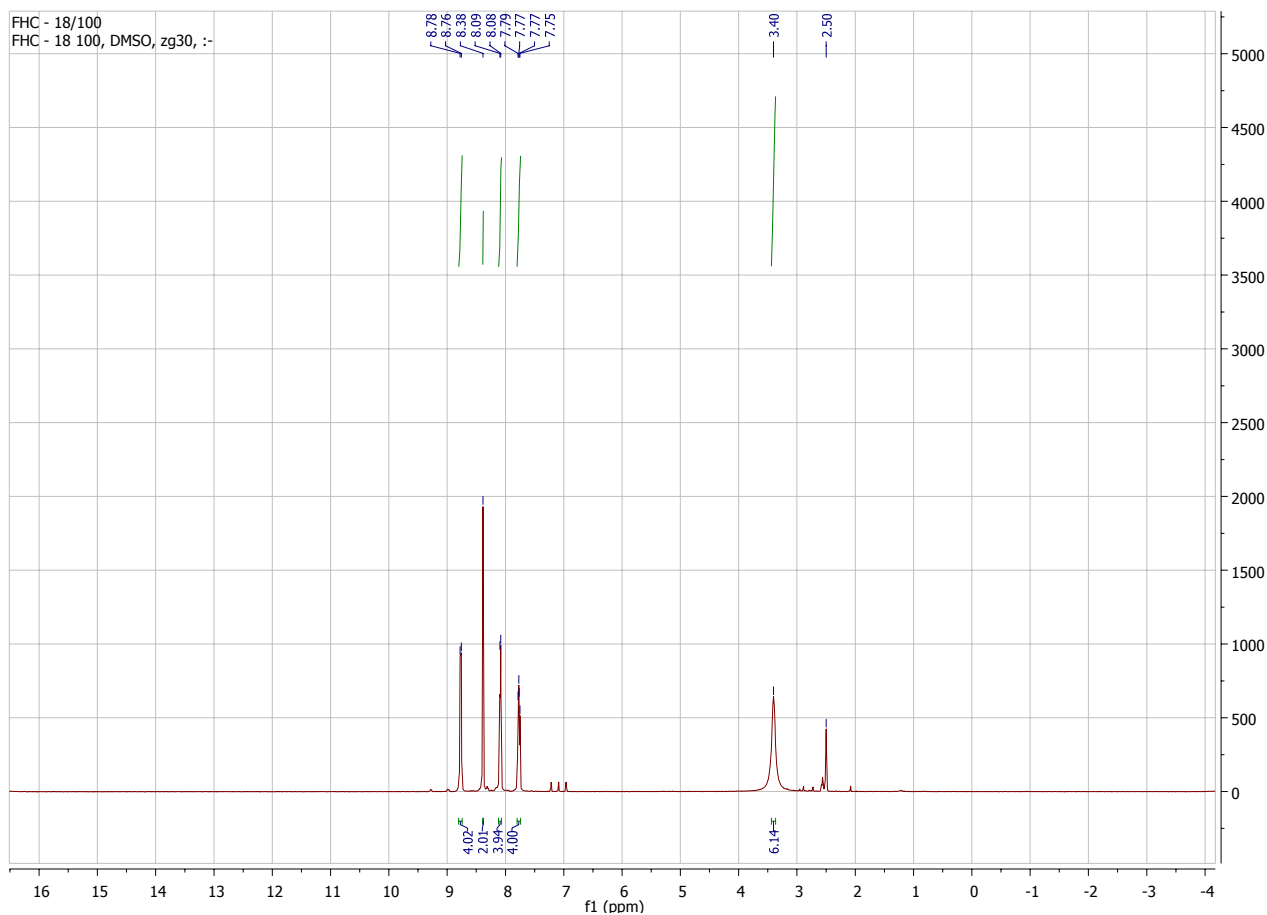

Aromatic region of  $^1\text{H}$  NMR spectrum of complex  $[\text{Ru}(\text{L}_2)_2(\text{NCS})_2]$ .

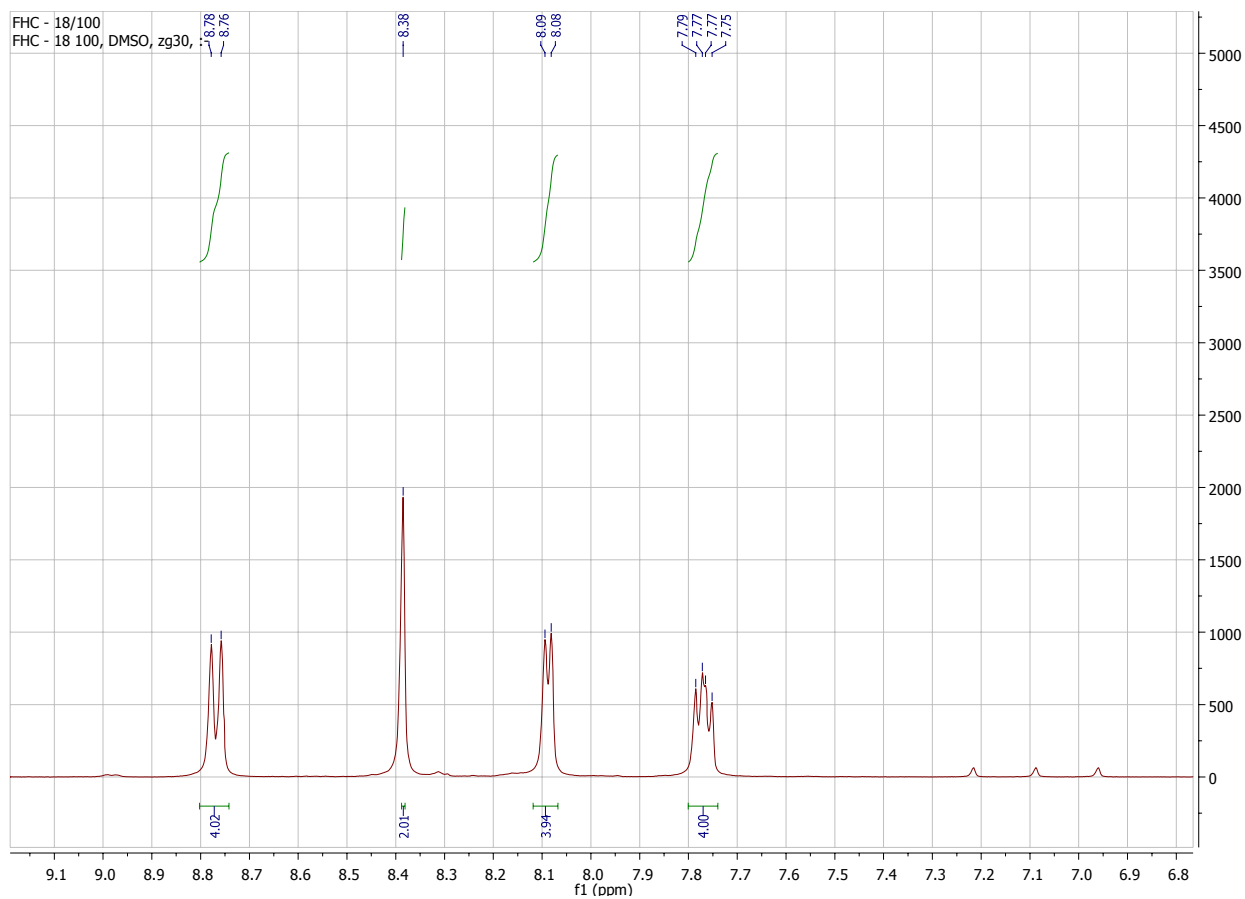

Supplement: Supplementary File 1 [file molecules-16-08353-s001.pdf]
